# Supplementary material
Source: Springer Nature journal article supplement (https://cris.unibo.it/retrieve/6b86c379-e629-4ac5-a75f-ccea272a4e31/41431_2026_2063_MOESM1_ESM.xlsx)
Supplement: MOESM1 [file 41431_2026_2063_MOESM1_ESM.xlsx]

## Sheet: Foglio1
Supplementary Table 1. Characteristics of participating laboratories, including institutional type, organizational complexity, testing unit, patient categories, request origin, specialists involved, consent procedures, and counselling practices.
	n	%
Unit performing PGx testing
Genetics unit	19	39
Clinical pathology and biochemistry unit	9	18
Pharmacology unit	6	12
Pathology unit	2	4
Other	13	27
Patient categories undergoing PGx testing*
Outpatient care	44	90
Inpatient care	42	86
Private care	22	45
Origin of requests
Internal (same institution)	13	27
External (other institutions)	5	10
Both	31	63
Specialists requesting PGx testing*
Oncologist	46	94
Infectious Diseases Specialist	5	10
Surgeon	5	10
Neurologist	4	8
Cardiologist	3	6
Radiotherapist	3	6
Geneticist	2	4
Rheumatologist	2	4
Psychiatrist	1	2
General practitioner	1	2
Other (pathologist, dermatologist, internist, immunologist, hematologist)	7	14
Informed consent required
Yes	36	73
No	13	27
Incidental findings reported to the patient
No	44	90
Yes	5	10
Specialty of personnel signing PGx reports*
Geneticist	32	65
Clinical pathologist / biochemist	15	31
Pharmacologist	6	12
Other	4	8
Written comment provided with PGx results
Yes	44	90
No	5	10
If a comment is provided, it includes*:
Indication of risk phenotype (toxicity/inefficacy)	36	73
Interpretation of genetically predicted phenotype	23	47
Prescriptive dosing recommendation (pharmacological counselling)	12	24
Referral to guidelines or specialist	15	31
Separate pharmacological counseling reports
No	28	57
Yes	9	18
Not disclosed	12	24
Pharmacologic counseling available for PGx reports from other laboratories
No	43	88
Yes	6	12
Number of PGx tests performed in the last year
>200	33	69
100–200	9	19
50–100	2	4
<50	4	8
Turnaround time (TAT) for DPYD testing	Median (IQR)
	6.5 (5–9.25) days	–
Reimbursement by National Health Service
Yes, for all tests	36	73
Yes, for some tests	11	22
No	2	4
